# Supplementary material for: SARS-CoV-2 ORF 3a-mediated currents are inhibited by antiarrhythmic drugs
Source: PubMed Central journal article supplement — Europace. 2024 Oct 16;26(10):euae252. doi: 10.1093/europace/euae252 (PMC11481279; doi:10.1093/europace/euae252), 2024-10-16

## **Supplementary material to:**

### **SARS-CoV-2 ORF 3a-mediated currents are inhibited by antiarrhythmic drugs**

Felix Wiedmann<sup>1,2,3</sup>, Emika Boondej<sup>1</sup>, Megan Stanifer<sup>4</sup>, Amelie Paasche<sup>1,2</sup>, Manuel Kraft<sup>1,2,3</sup>, Merten Prüser<sup>1,2</sup>, Timon Seeger<sup>1,2</sup>, Ulrike Uhrig<sup>5</sup>, Steeve Boulant<sup>4</sup>, Constanze Schmidt<sup>1,2,3\*</sup>

<sup>1</sup> Department of Cardiology, University Hospital Heidelberg, Heidelberg, Germany; <sup>2</sup> DZHK (German Center for Cardiovascular Research), partner site Heidelberg /Mannheim, University of Heidelberg, Heidelberg, Germany; <sup>3</sup>HCR, Heidelberg Center for Heart Rhythm Disorders, University Hospital Heidelberg, Heidelberg, Germany; <sup>4</sup> Department of Molecular Genetics and Microbiology, University of Florida, College of Medicine, Gainesville, Florida, USA, German; <sup>5</sup>Chemical Biology Core Facility, EMBL, Heidelberg, Germany.

**EP Europace, EUPC-D-24-00480**

#### **\*Corresponding author:**

Prof. Dr. med. Constanze Schmidt, FESC, FEHRA

Department of Cardiology

Medical University Hospital Heidelberg

Im Neuenheimer Feld 410

D-69120 Heidelberg, Germany

Tel.: ++49 6221 568187

Fax: ++49 6221 565724

E-Mail: [Constanze.Schmidt@med.uni-heidelberg.de](mailto:Constanze.Schmidt@med.uni-heidelberg.de)

# Figure S1:

|                    | K61                    | K75                                   |                                |
|--------------------|------------------------|---------------------------------------|--------------------------------|
| Wuhan-Hu-1         | LPGWLVIVGVALAVFQSASK   | IITLKKRWQLALS                         | KGVHFVCNLLLLFVTVYSHLLLVAAG 100 |
| BavPat1            | LPGWLVIVGVALAVFQSASK   | IITLKKRWQLALS                         | KGVHFVCNLLLLFVTVYSHLLLVAAG 100 |
| Alpha(B.1.1.7)     | LPGWLVIVGVALAVFQSASK   | IITLKKRWQLALS                         | KGVHFVCNLLLLFVTVYSHLLLVAAG 100 |
| Beta(B.1.351)      | LPGWLVIVGVALAVFQSASK   | IITLKKRWQLALS                         | KGVHFVCNLLLLFVTVYSHLLLVAAG 100 |
| Gamma(P.1)         | LPGWLVIVGVALAVFQSASK   | IITLKKRWQLALS                         | KGVHFVCNLLLLFVTVYSHLLLVAAG 100 |
| Delta(B.1.617.2)   | LPGWLVIVGVALAVFQSASK   | IITLKKRWQLALS                         | KGVHFVCNLLLLFVTVYSHLLLVAAG 100 |
| Omicron(B.1.1.529) | LPGWLVIVGVALAVFQSASK   | IITLKKRWQLALS                         | KGVHFVCNLLLLFVTVYSHLLLVAAG 100 |
| Zeta(P.2)          | LPGWLVIVGVALAVFQSASK   | IITLKKRWQLALS                         | KGVHFVCNLLLLFVTVYSHLLLVAAG 100 |
| Lambda(C.37)       | LPGWLVIVGVALAVFQSASK   | IITLKKRWQLALS                         | KGVHFVCNLLLLFVTVYSHLLLVAAG 100 |
|                    | *****                  | *****                                 | *****                          |
|                    | D142                   |                                       |                                |
| Wuhan-Hu-1         | VRIIMRLWLCWKCRSKNPLLYD | ANYFLCWHTNCYDYCIPYNSVTSSIVITSGDGTSPIS | 180                            |
| BavPat1            | VRIIMRLWLCWKCRSKNPLLYD | ANYFLCWHTNCYDYCIPYNSVTSSIVITSGDGTSPIS | 180                            |
| Alpha(B.1.1.7)     | VRIIMRLWLCWKCRSKNPLLYD | ANYFLCWHTNCYDYCIPYNSVTSSIVITSGDGTSPIS | 180                            |
| Beta(B.1.351)      | VRIIMRLWLCWKCRSKNPLLYD | ANYFLCWHTNCYDYCIPYNSVTSSIVITLGDGTSPIS | 180                            |
| Gamma(P.1)         | VRIIMRLWLCWKCRSKNPLLYD | ANYFLCWHTNCYDYCIPYNSVTSSIVITSGDGTSPIS | 180                            |
| Delta(B.1.617.2)   | VRIIMRLWLCWKCRSKNPLLYD | ANYFLCWHTNCYDYCIPYNSVTSSIVITSGDGTSPIS | 180                            |
| Omicron(B.1.1.529) | VRIIMRLWLCWKCRSKNPLLYD | ANYFLCWHTNCYDYCIPYNSVTSSIVITSGDGTSPIS | 180                            |
| Zeta(P.2)          | VRIIMRLWLCWKCRSKNPLLYD | ANYFLCWHTNCYDYCIPYNSVTSSIVITSGDGTSPIS | 180                            |
| Lambda(C.37)       | VRIIMRLWLCWKCRSKNPLLYD | ANYFLCWHTNCYDYCIPYNSVTSSIVITSGDGTSPIS | 180                            |
|                    | *****                  | *****                                 | *****                          |

## SARS-CoV2 ORF3a amino acids K61, K75 and D142 are highly conserved among clinically common SARS-CoV2 strains

Protein sequence alignment of ORF 3a protein sequences, derived from different clinically relevant SARS-CoV2 strains, showing the high degree of conservation among the amino acid residues lysine 61 (K61), lysine 75 (K75), and aspartic acid 142 (D142), identified to contribute to the molecular binding site of class III antiarrhythmic drugs. \*, conserved amino acid.

# ORF 3a antibody test:

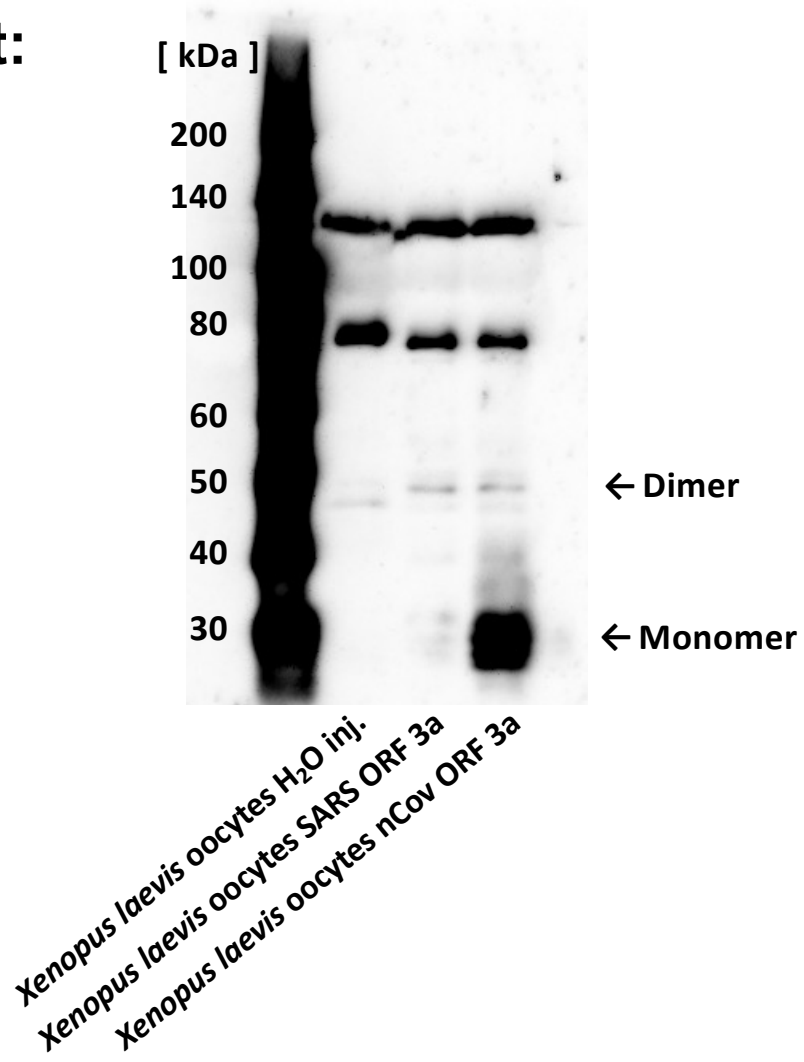

**Figure 1a – Membrane 1 – ORF 3a**

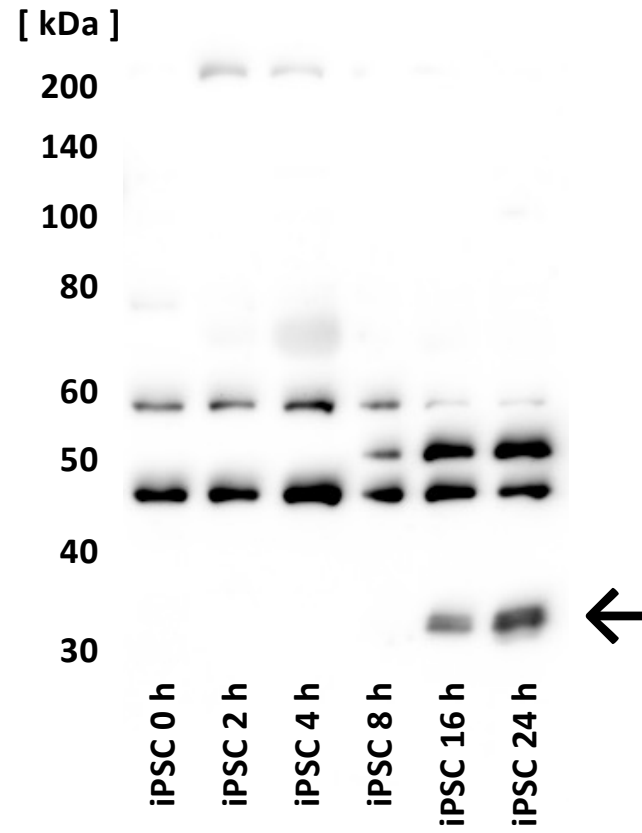

**Figure 1a – Membrane 2 – ORF 3a**

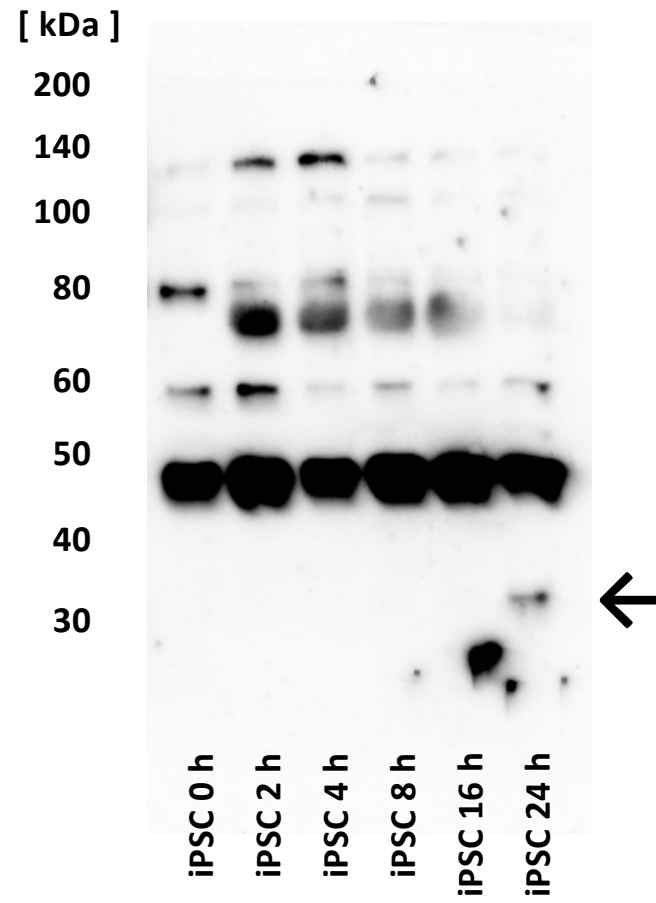

Figure 1a – Membrane 3 – ORF 3a

[ kDa ]

200

140

100

80

60

50

40

30

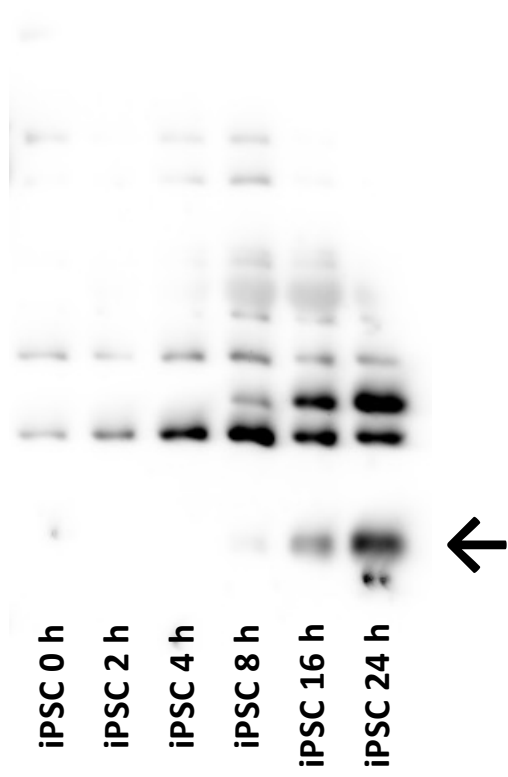

**Figure 1a – Membrane 1 –  $\beta$ -actin**

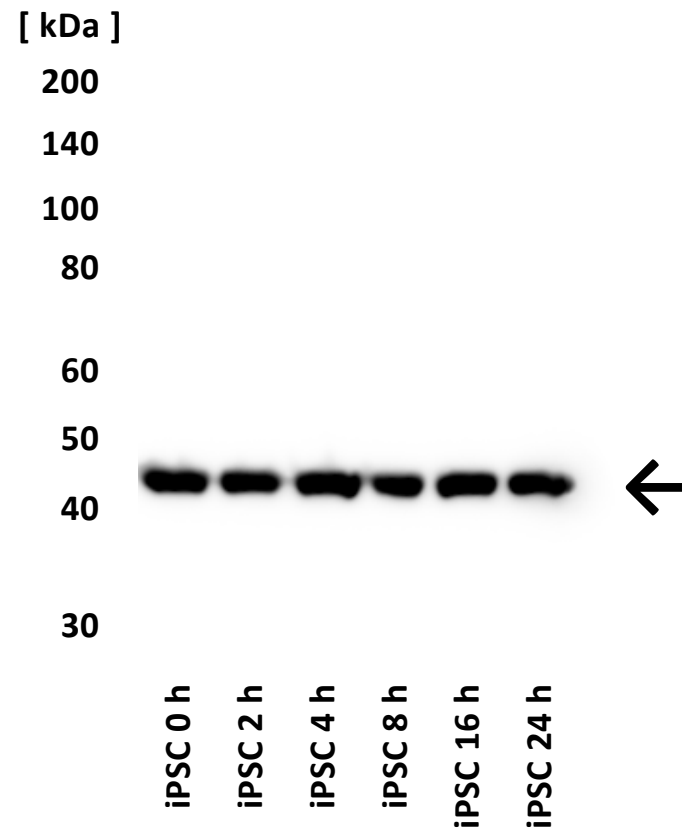

**Figure 1a – Membrane 2 –  $\beta$ -actin**

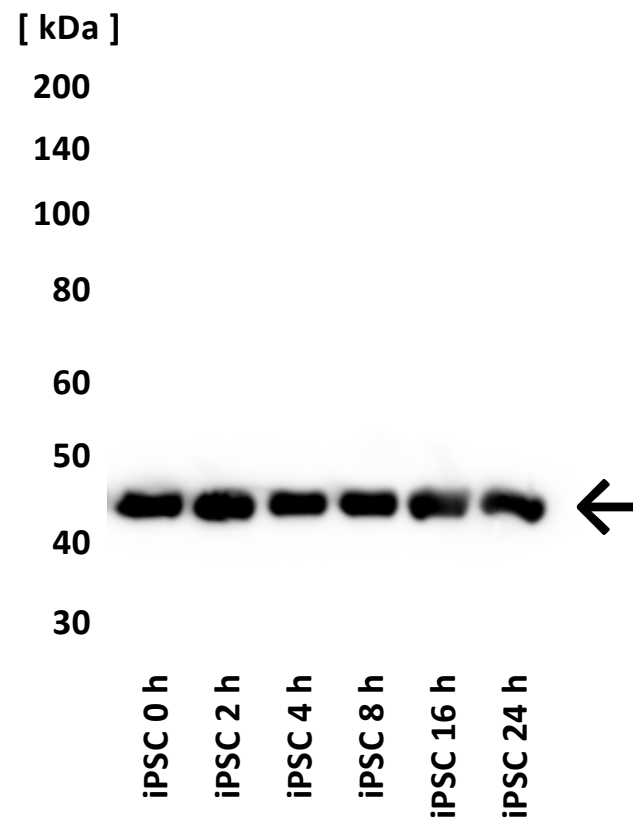



**Figure 1a – Membrane 3 –  $\beta$ -actin**

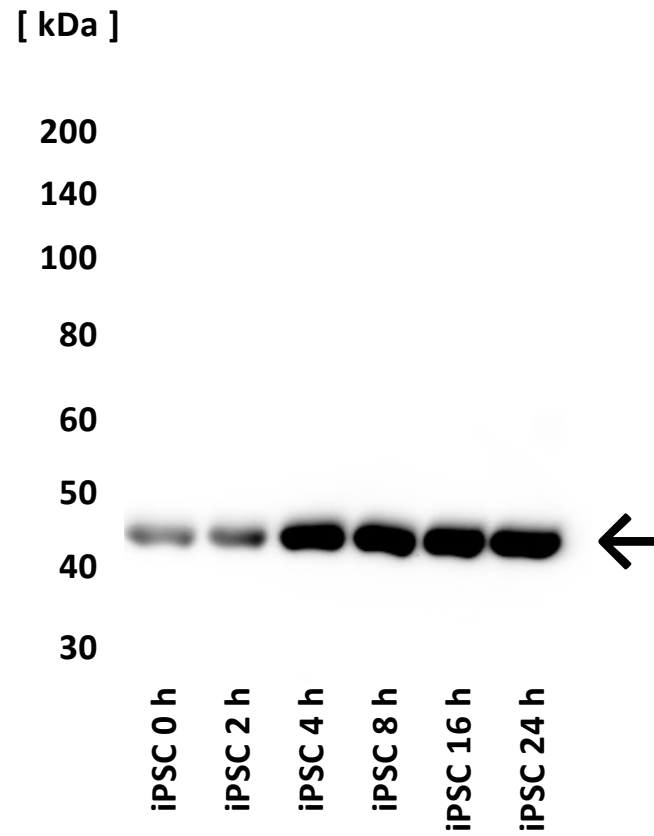

Figure 1b – Membrane 1 – ORF 3a

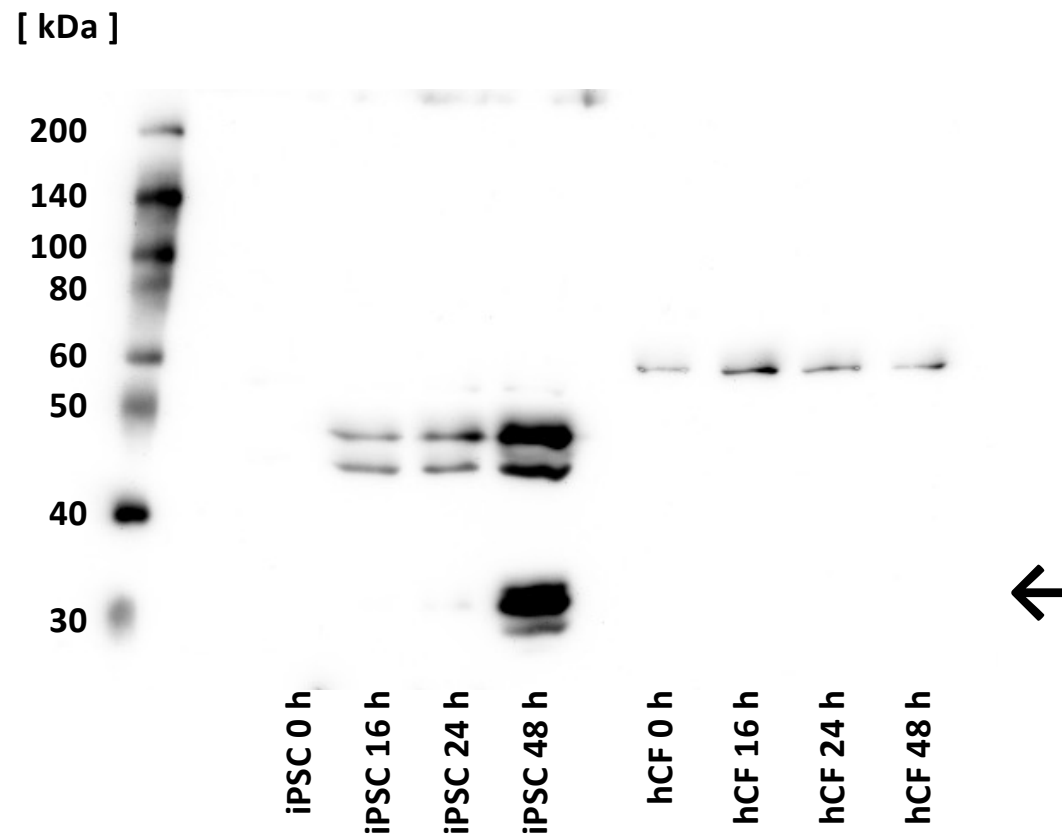

Figure 1b – Membrane 2 – ORF 3a

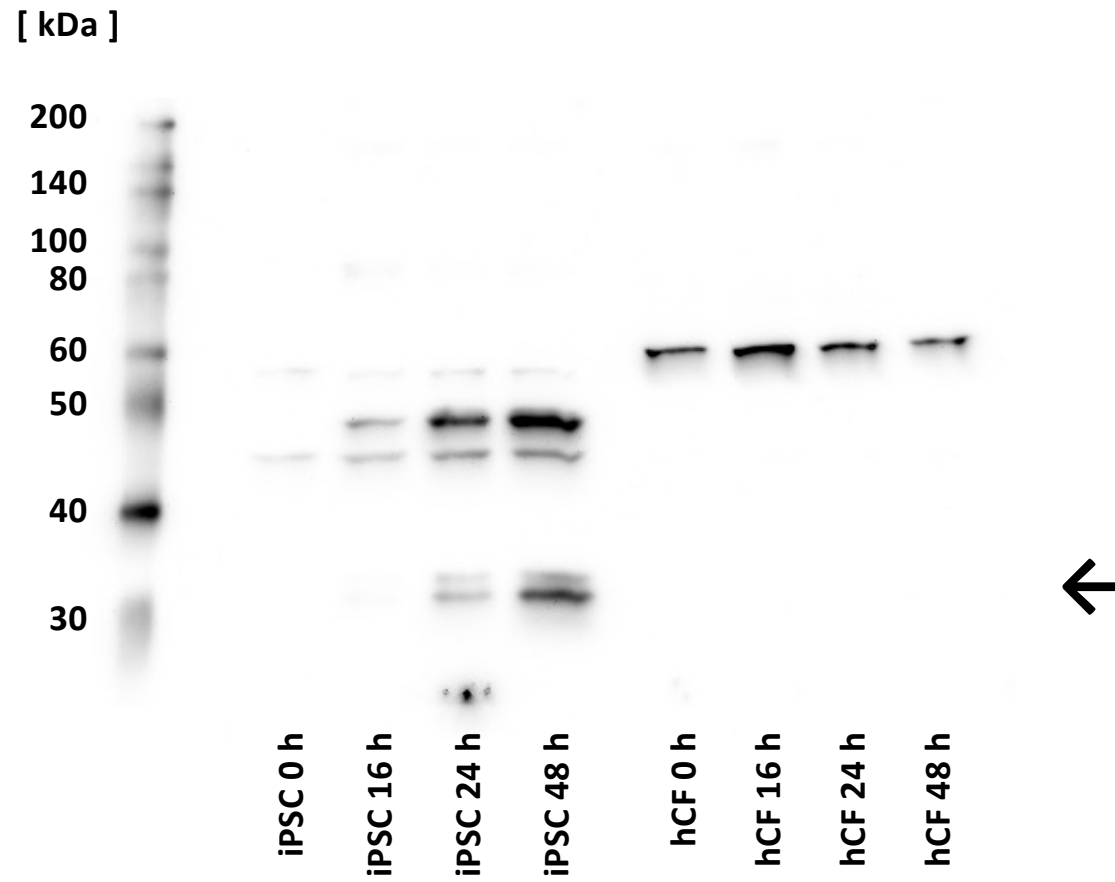

Figure 1b – Membrane 3 – ORF 3a

[ kDa ]

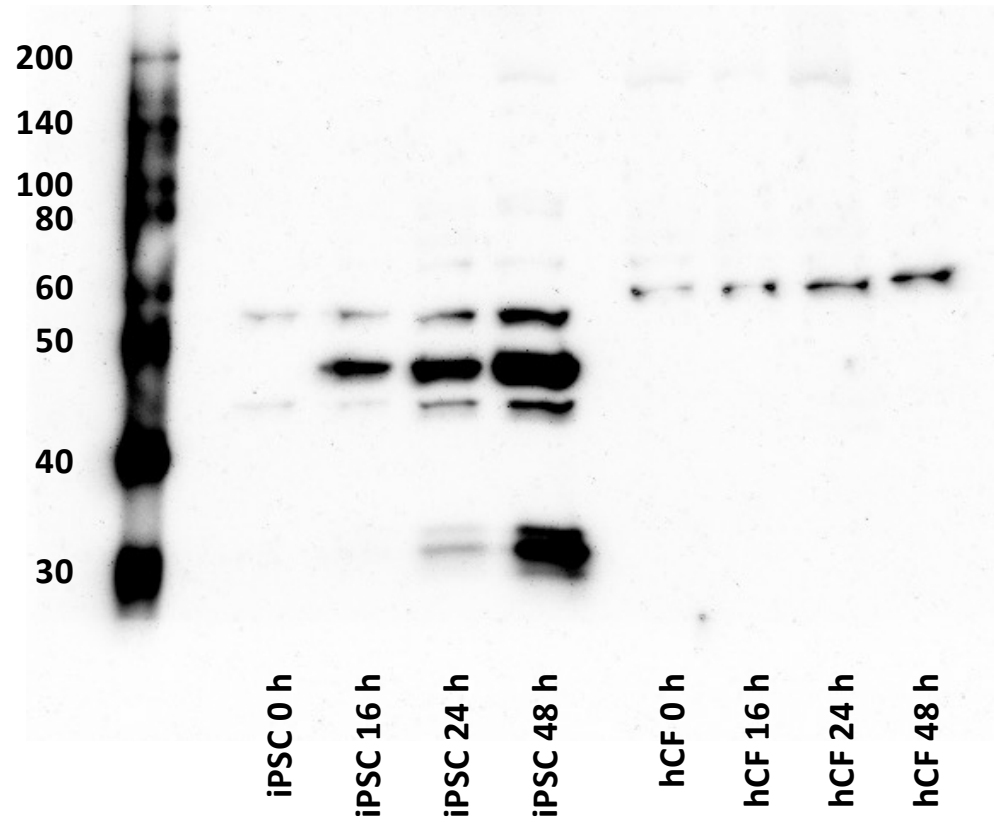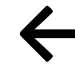

**Figure 1b – Membrane 1 –  $\beta$ -actin**

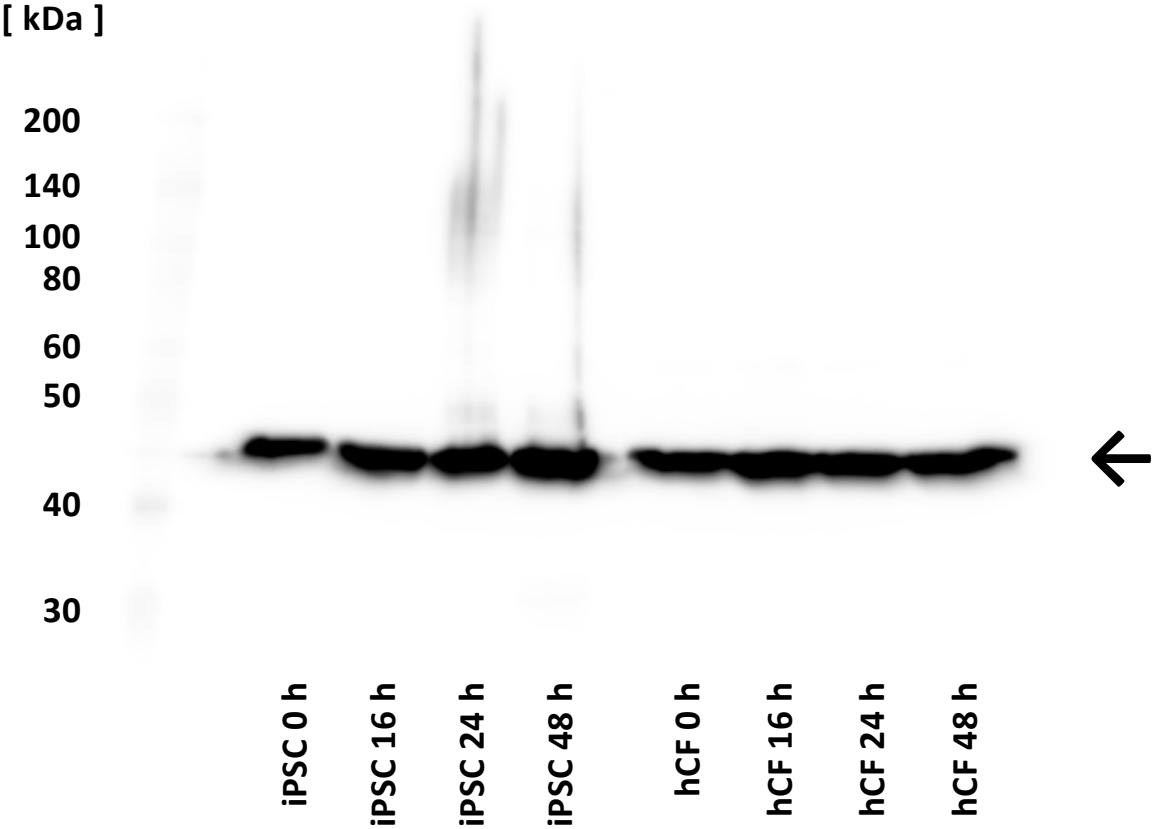

Figure 1b – Membrane 2 –  $\beta$ -actin

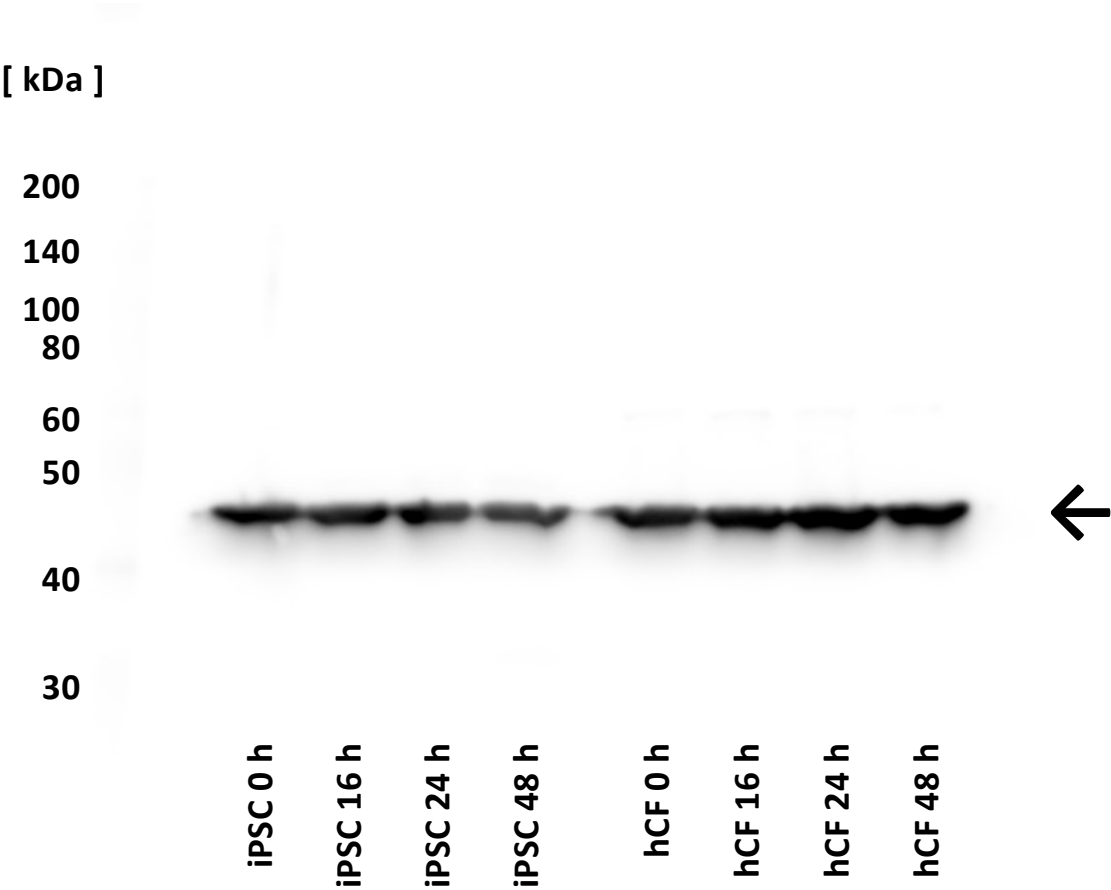

**Figure 1b – Membrane 3 –  $\beta$ -actin**

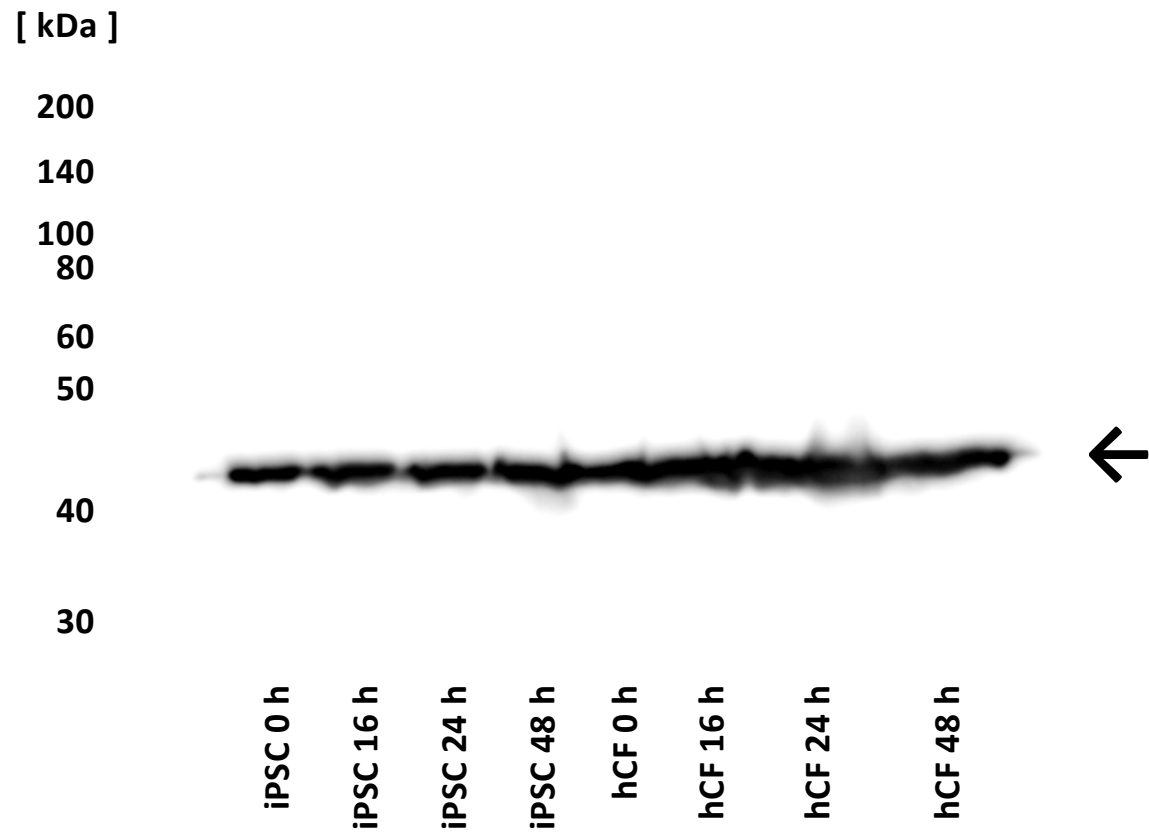

Supplement: euae252_supplementary_data.pdf [file euae252_supplementary_data.pdf]
